# Supplementary material
Source: PubMed Central journal article supplement (PMC10571073)

## Supporting Information:

### Correction to “Changes in a Metabolic Chemical Reporter Structure Yield a Selective Probe of O-GlcNAc Modification”

Kelly N. Chuh, Balyn W. Zaro, Friedrich Piller, Véronique Piller, and Matthew R. Pratt\*

*J. Am. Chem. Soc.* 2014, 136, 35, 12283–12295 doi:[10.1021/ja504063c](https://doi.org/10.1021/ja504063c)

Mass spectral (MS) analyses of compounds **4**, **5**, and **7** can be found below with the correct mass peaks highlighted.

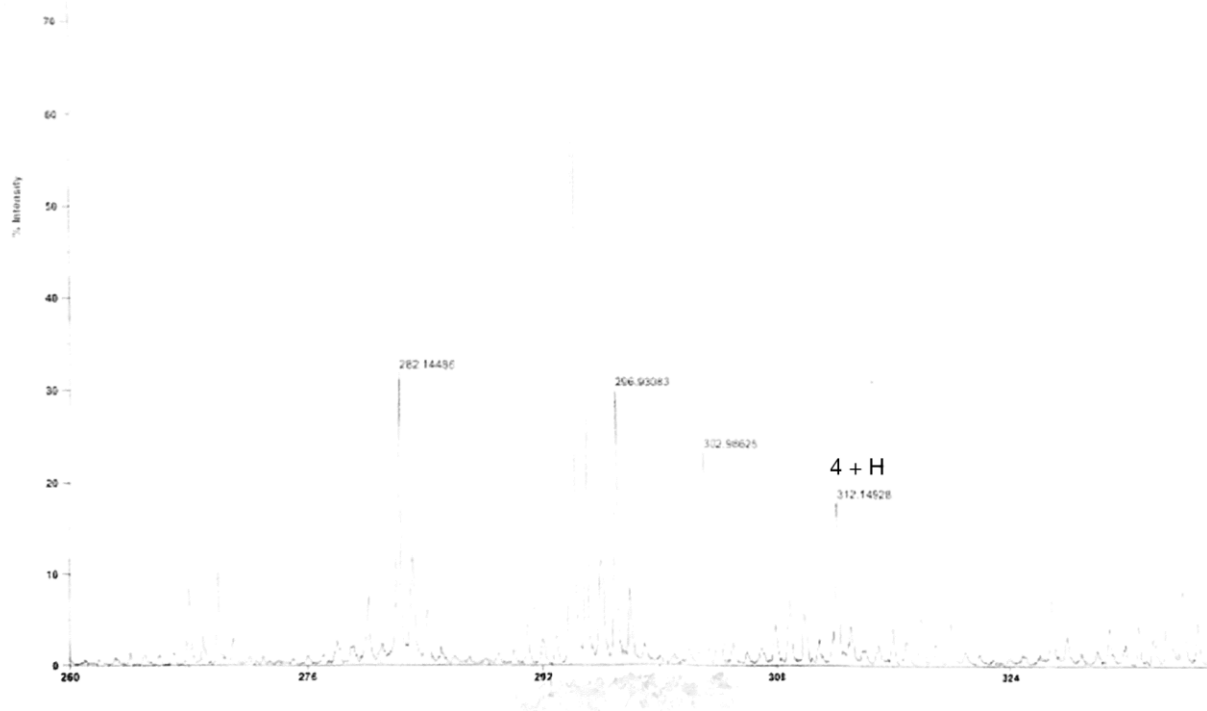

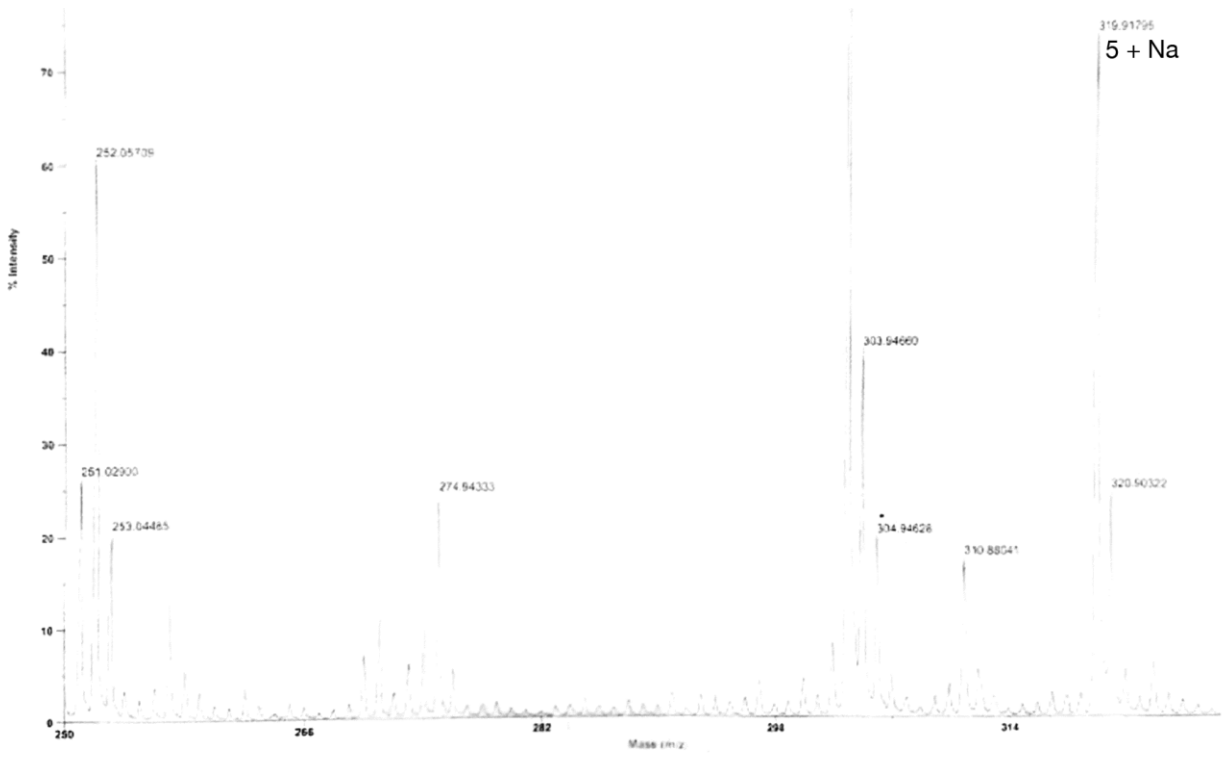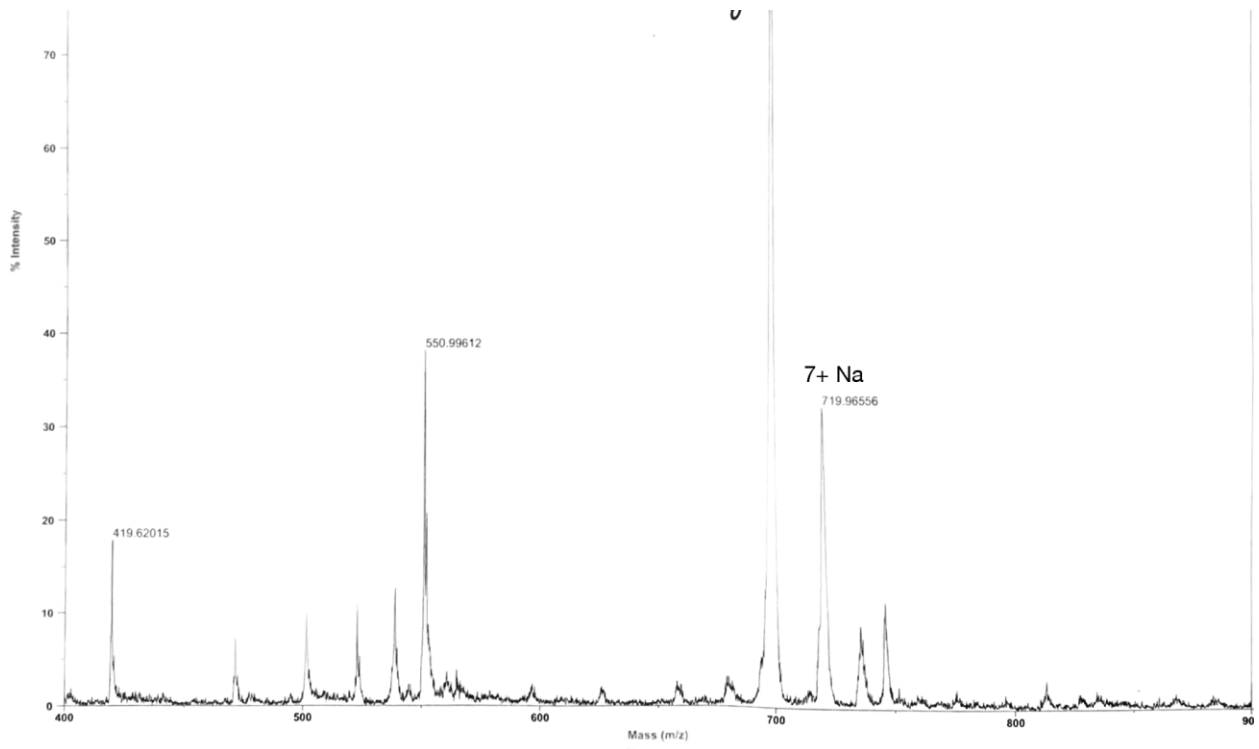

Supplement: ja3c08368_si_002.pdf [file ja3c08368_si_002.pdf]
